# Supplementary material for: Behavioral and neural network abnormalities in human APP transgenic mice resemble those of App knock-in mice and are modulated by familial Alzheimer’s disease mutations but not by inhibition of BACE1
Source: PubMed Central journal article supplement (PMC7489007; doi:10.1186/s13024-020-00393-5), 2020-09-14

**Table S1** Antibodies Used

| PRIMARY                                            |                    |              |                                          |           |                    |                                    |
|----------------------------------------------------|--------------------|--------------|------------------------------------------|-----------|--------------------|------------------------------------|
| Antigen                                            | Antibody Name*     | Host Species | Source                                   | Catalog # | Assay              | Dilution                           |
| A $\beta$ <sub>1-5</sub>                           | 3D6                | Mouse        | Janssen or from ATCC hybridoma cell line | PTA-5130  | WB<br>IHC<br>ELISA | 1:1,000<br>1:3,000<br>2 $\mu$ g/ml |
| A $\beta$ <sub>1-12</sub>                          | 26D6               | Mouse        | Bristol-Myers Squibb                     |           | WB<br>ELISA        | 1:1,000<br>2 $\mu$ g/ml            |
| A $\beta$ <sub>1-16</sub>                          | 82E1               | Mouse        | IBL                                      | 10326     | WB                 | 1:1,000                            |
| A $\beta$ <sub>3-8</sub>                           | 6E10               | Mouse        | BioLegend                                | 803001    | WB                 | 1:1,000                            |
| A $\beta$ <sub>13-28</sub>                         | 266                | Mouse        | Janssen                                  |           | ELISA              | 10 $\mu$ g/ml                      |
| A $\beta$ <sub>33-42</sub>                         | 21F12              | Mouse        | Janssen                                  |           | ELISA              | 5 $\mu$ g/ml                       |
| Actin $\alpha$ 1                                   | Actin              | Rabbit       | Sigma-Aldrich                            | A2066     | WB                 | 1:3,000                            |
| APP A4 (N-Term)                                    | 22C11              | Mouse        | EMD Millipore                            | MAB348    | WB                 | 1:1,000                            |
| Human APP                                          | 8E5                | Mouse        | Janssen                                  |           | WB                 | 1:10,000                           |
| APP (CTFs)                                         | CT15               | Rabbit       | Edward Koo, UCSD                         |           | WB                 | 1:2,000                            |
|                                                    | 85461              | Mouse        | Bristol-Myers Squibb                     |           | WB                 | 1:1,000                            |
| Calbindin                                          |                    | Rabbit       | Swant                                    | CB38      | IHC                | 1:30,000                           |
| c-Fos [2H2]                                        |                    | Mouse IgG1   | Abcam                                    | ab208942  | IHC                | 1:2,000                            |
| EAAT2                                              |                    | Rabbit       | Abcam                                    | ab41621   | WB                 | 1:3,000                            |
| GAPDH                                              |                    | Mouse        | Millipore                                | MAB374    | WB                 | 1:10,000                           |
| Iba1                                               |                    | Rabbit       | Wako                                     | 019-19741 | IHC                | 1:1000                             |
| Nav1.1                                             |                    | Rabbit       | Alomone Labs                             | ASC-001   | WB                 | 1:1,000                            |
| Nav1.2                                             |                    | Rabbit       | Alomone Labs                             | ASC-002   | WB                 | 1:1,000                            |
| Nav1.6                                             |                    | Rabbit       | Alomone Labs                             | ASC-009   | WB                 | 1:1,000                            |
| Neuropeptide Y                                     |                    | Rabbit       | ImmunoStar                               | 22940     | IHC                | 1:2,000                            |
| NR1                                                |                    | Mouse        | EMD Millipore                            | 05-432    | WB                 | 1:1,000                            |
| Pan Voltage-gated Sodium Channel, $\alpha$ subunit | PanNa <sub>v</sub> | Rabbit       | Sigma-Aldrich                            | S6936     | WB                 | 1:1,000                            |
| Parvalbumin                                        |                    | Rabbit       | Swant                                    | PV27      | WB                 | 1:5,000                            |



| Spondin-1            | SPON1                 | Rabbit              | Abcam                  | ab40797          | WB           | 1:1,000         |
|----------------------|-----------------------|---------------------|------------------------|------------------|--------------|-----------------|
| βIII-Tubulin         |                       | Rabbit              | Abcam                  | ab18207          | WB           | 1:3,000         |
| Zbtb20               |                       | Rat                 | BD Biosciences         | 565453           | WB           | 1:1,000         |
| <b>SECONDARY</b>     |                       |                     |                        |                  |              |                 |
| <b>Antibody Name</b> | <b>Conjugated Tag</b> | <b>Host Species</b> | <b>Source</b>          | <b>Catalog #</b> | <b>Assay</b> | <b>Dilution</b> |
| Anti-Mouse           | Alexa Fluor 546       | Donkey              | Life Technologies      | A10036           | IHC          | 1:500           |
|                      | Biotin-SP             | Goat                | Jackson ImmunoResearch | 115-067-003      | IHC          | 1:500           |
|                      | IRDye 680LT           | Goat                | LI-COR                 | 925-68020        | WB           | 1:10,000        |
|                      | IRDye 800CW           | Donkey              | LI-COR                 | 925-32212        | WB           | 1:10,000        |
| Anti-Rabbit          | Biotin-SP             | Donkey              | Jackson ImmunoResearch | 711-065-152      | IHC          | 1:1,000         |
|                      | HRP                   | Goat                | Calbiochem             | 401515           | WB           | 1:5,000         |
|                      | IRDye 680LT           | Goat                | LI-COR                 | 925-68021        | WB           | 1:10,000        |
|                      | IRDye 800CW           | Donkey              | LI-COR                 | 926-32213        | WB           | 1:10,000        |
| Anti-Rat             | HRP                   | Goat                | Millipore              | AP136P           | WB           | 1:1,000         |

\*left blank if synonymous with the antigen that the antibody recognizes

Figure S1

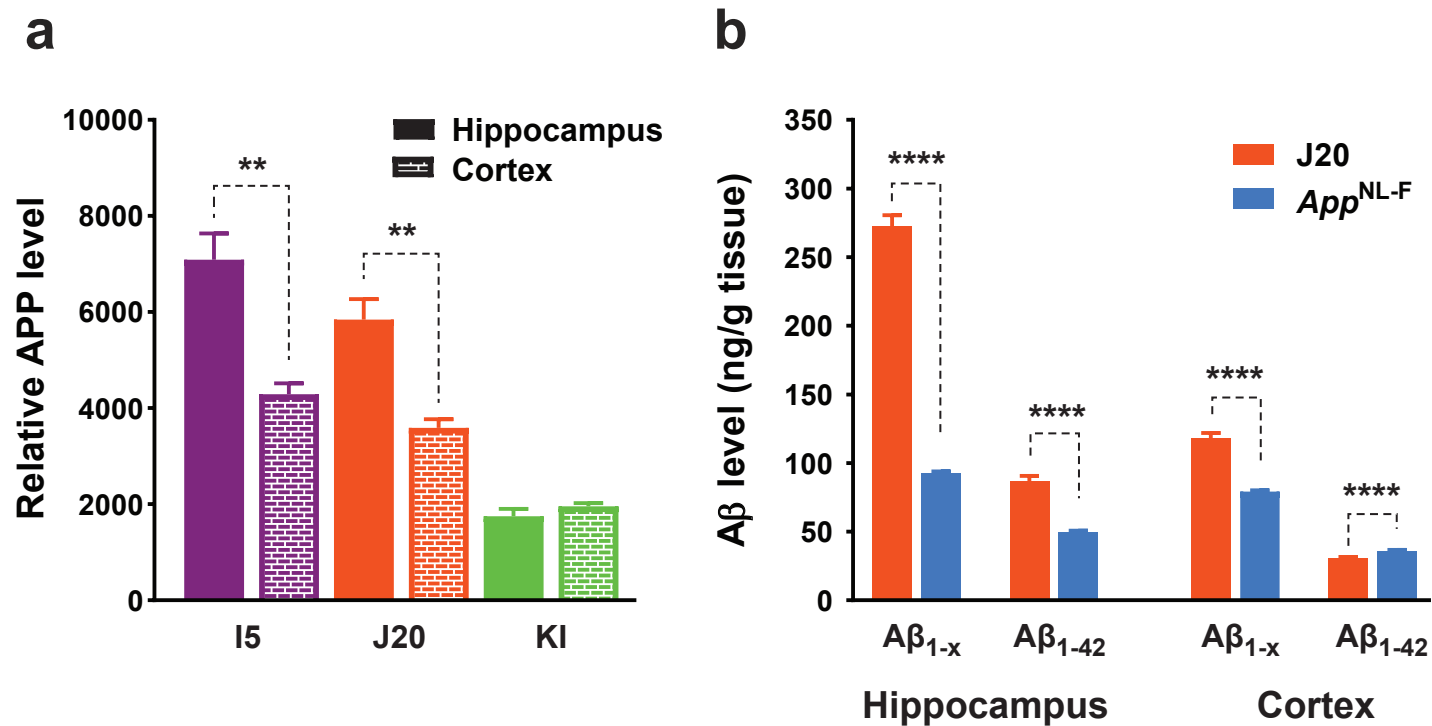

Figure S2

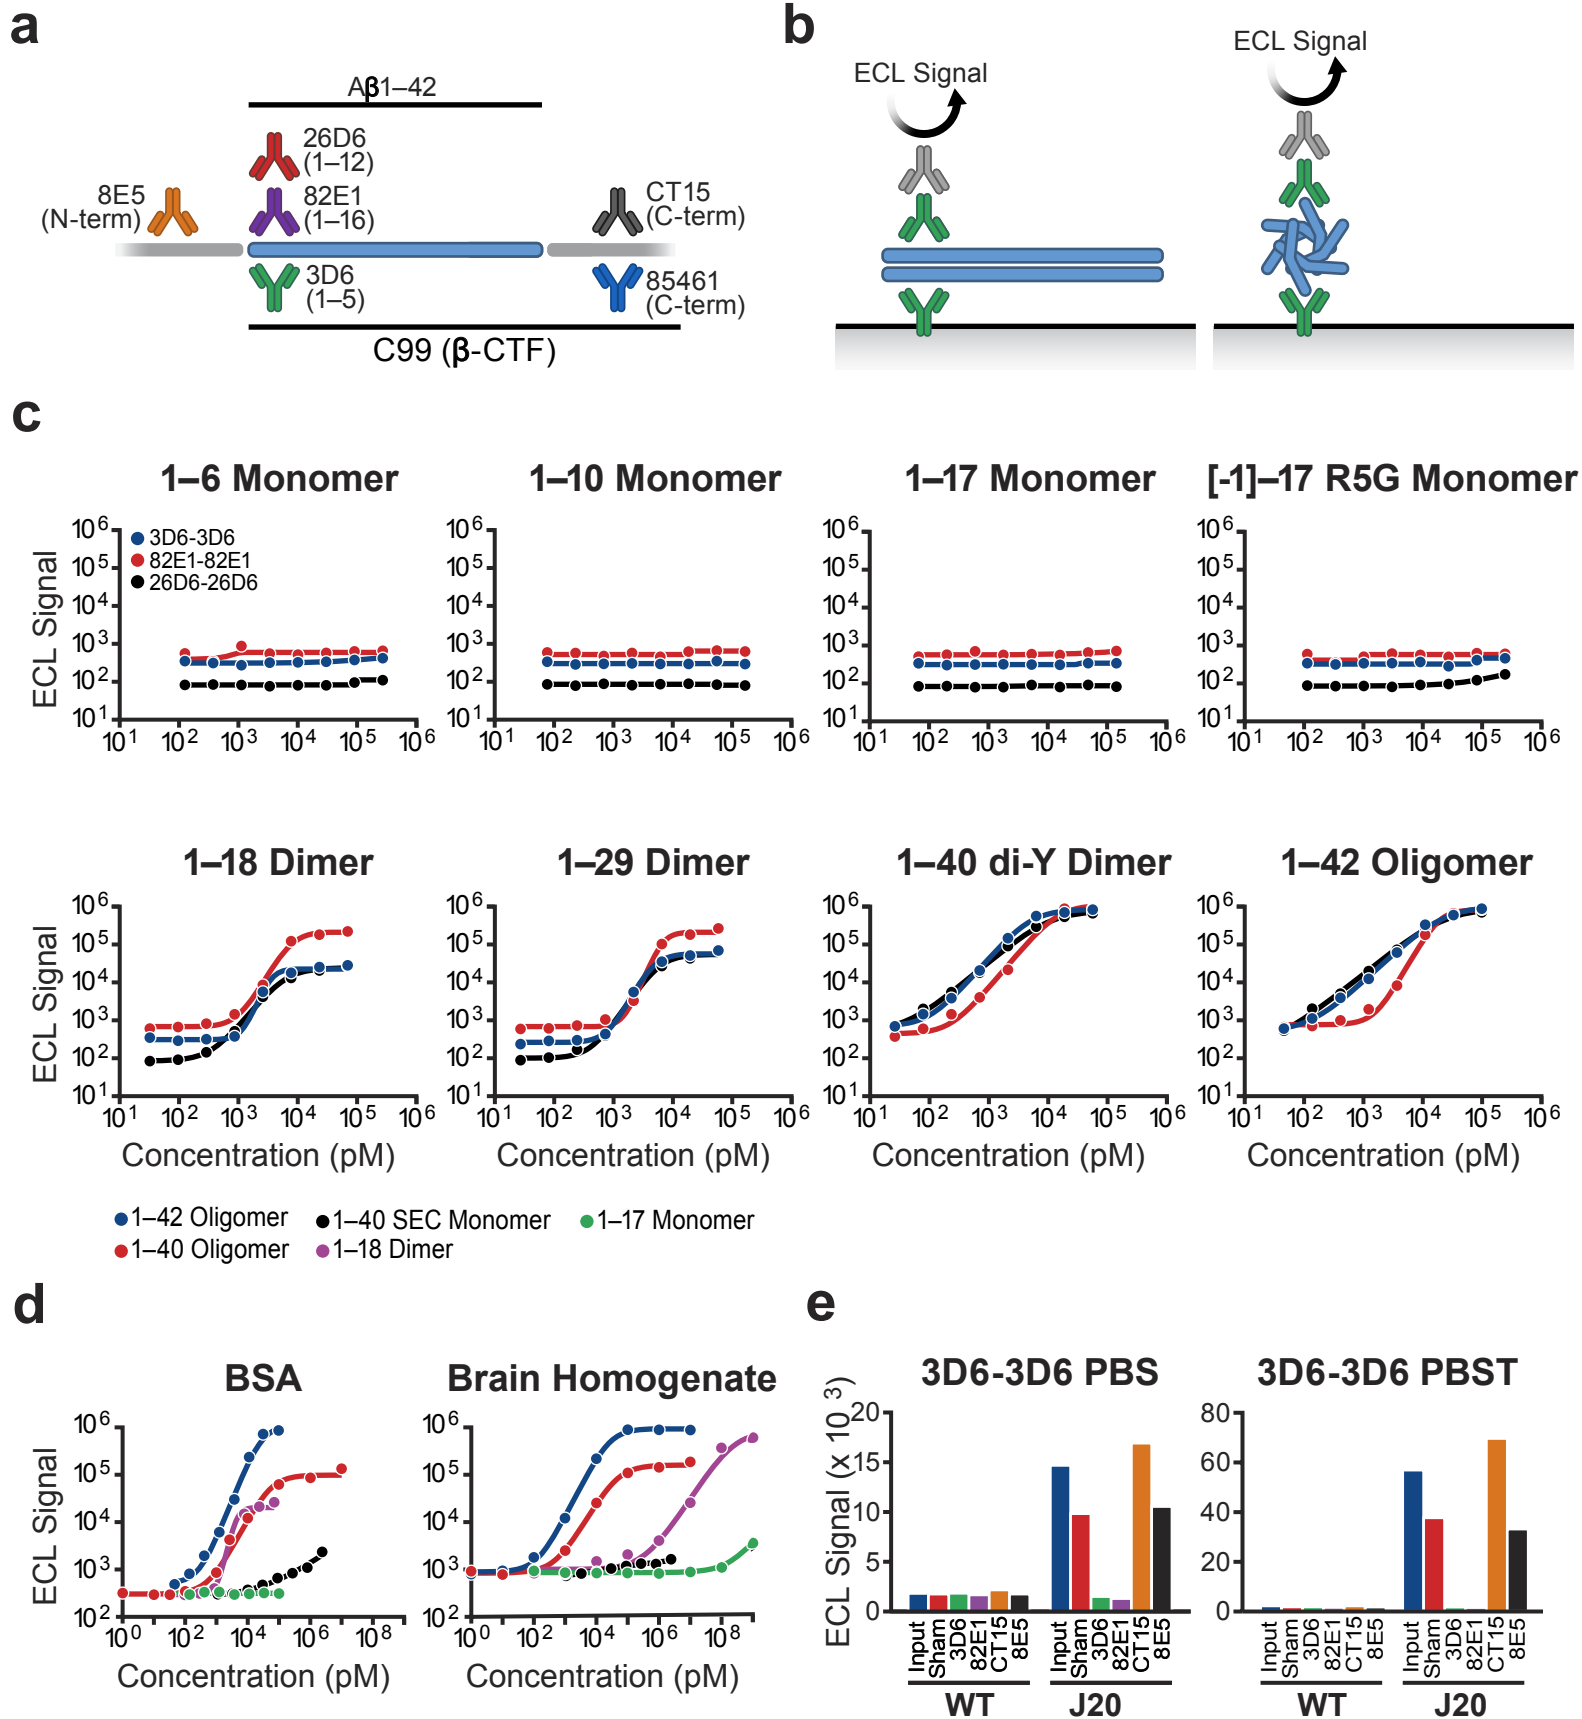

Figure S3

**a**

|                                             |                                     |
|---------------------------------------------|-------------------------------------|
| DAEFRH                                      | 1-6 monomer                         |
| DAEFRHDSGY                                  | 1-10 monomer                        |
| DAEFRHDSGYEVHHQKL                           | 1-17 monomer                        |
| MDAEF GHDSGYEVHHQKL                         | [-1]-17 R5G monomer                 |
| DAEFRHDSGYEVHHQKCG                          | 1-18 dimer                          |
| DAEFRHDSGYEVHHQKCG                          |                                     |
| DAEFRHDSGYEVHHQKLV(Nme) FF(Nme) AEDVGCNWG   | 1-29 dimer<br>(chemically-modified) |
| DAEFRHDSGYEVHHQKLV(Nme) FF(Nme) AEDVGCNWG   |                                     |
| DAEFRHDSGYEVHHQKLVFFAEDV GSNKGAIIGLMVGGVV   | 1-40                                |
| DAEFRHDSGYEVHHQKLVFFAEDVGSNKGAIIGLMVGGVV    | 1-40 di-Y dimer                     |
| DAEFRHDSGYEVHHQKLVFFAEDVGSNKGAIIGLMVGGVV    |                                     |
| DAEFRHDSGYEVHHQKLVFFAEDV GSNKGAIIGLMVGGVVIA |                                     |
| DAEFRHDSGYEVHHQKLVFFAEDV GSNKGAIIGLMVGGVVIA | 1-42                                |

**b**

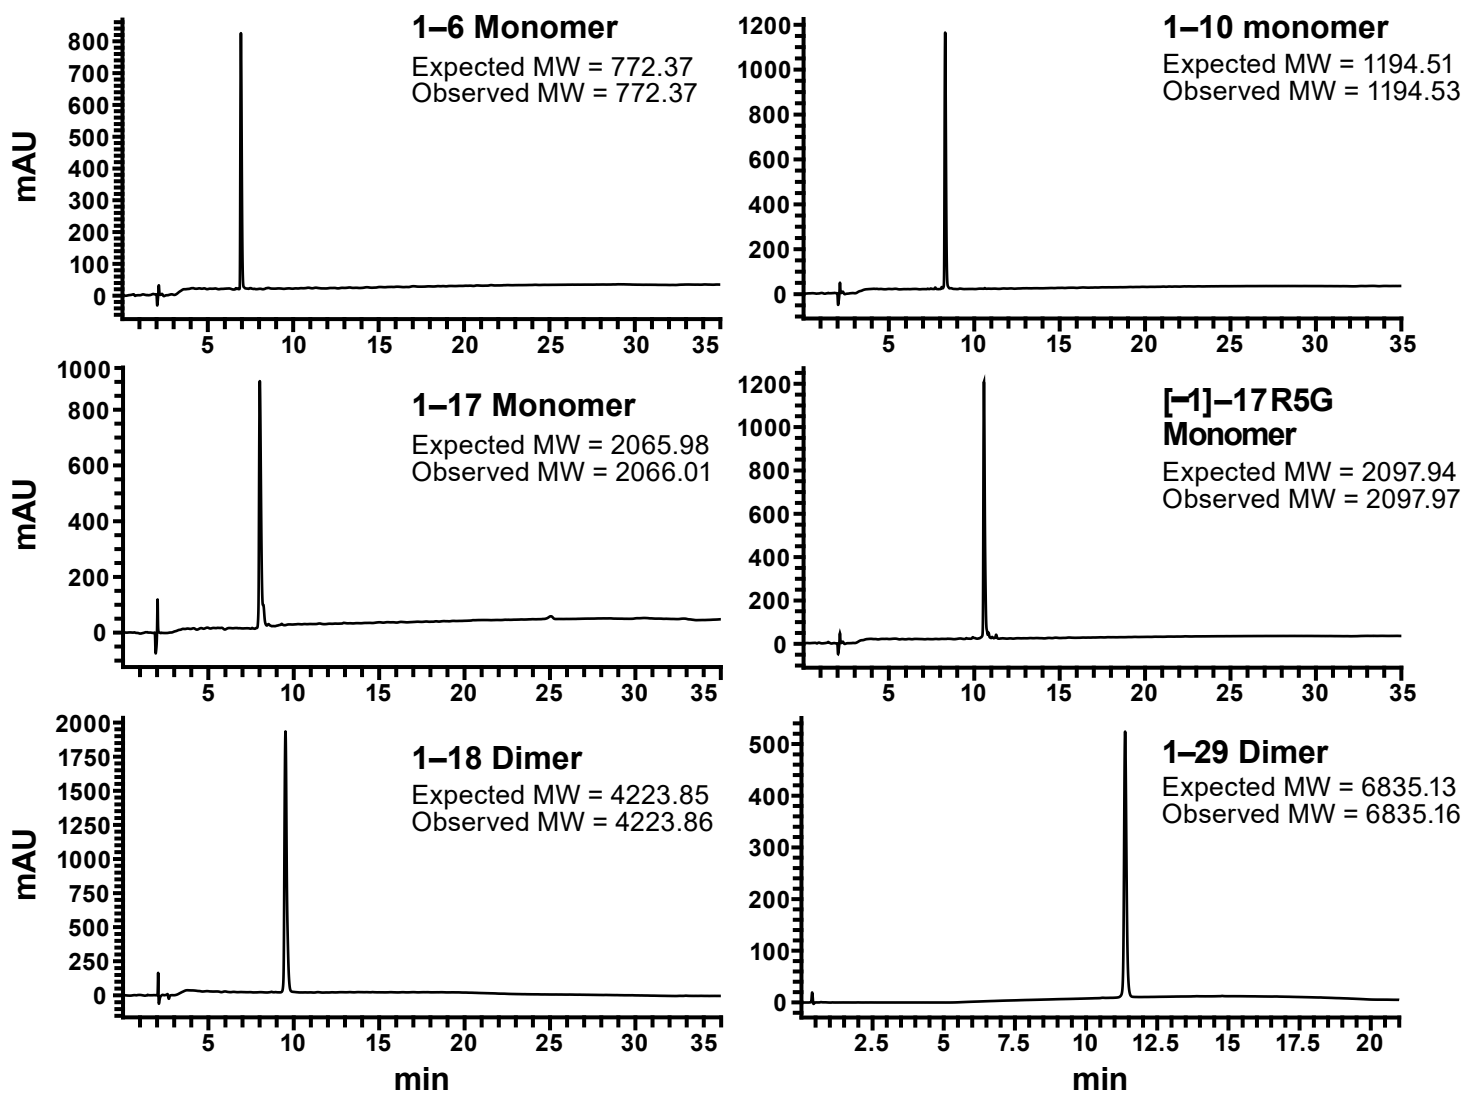

Figure S4

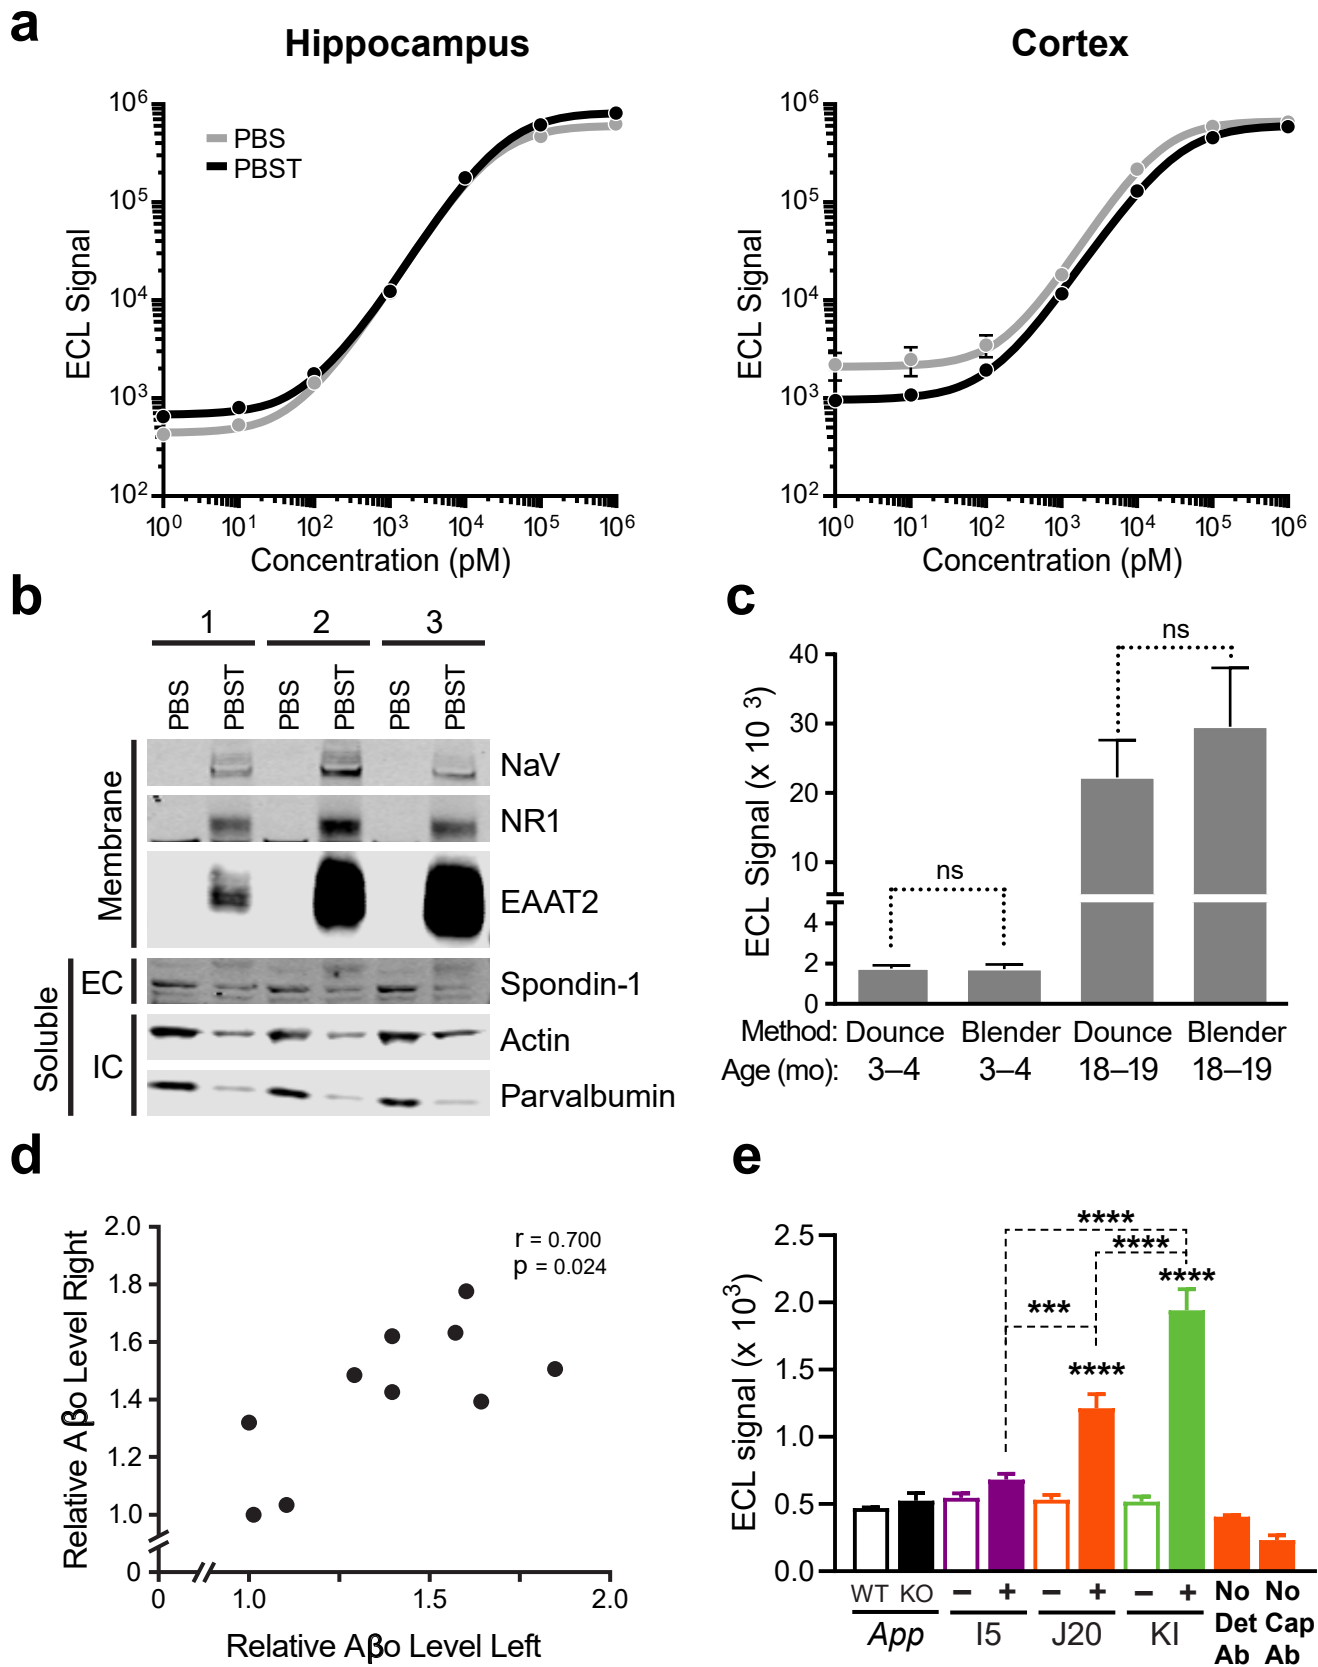

Figure S5

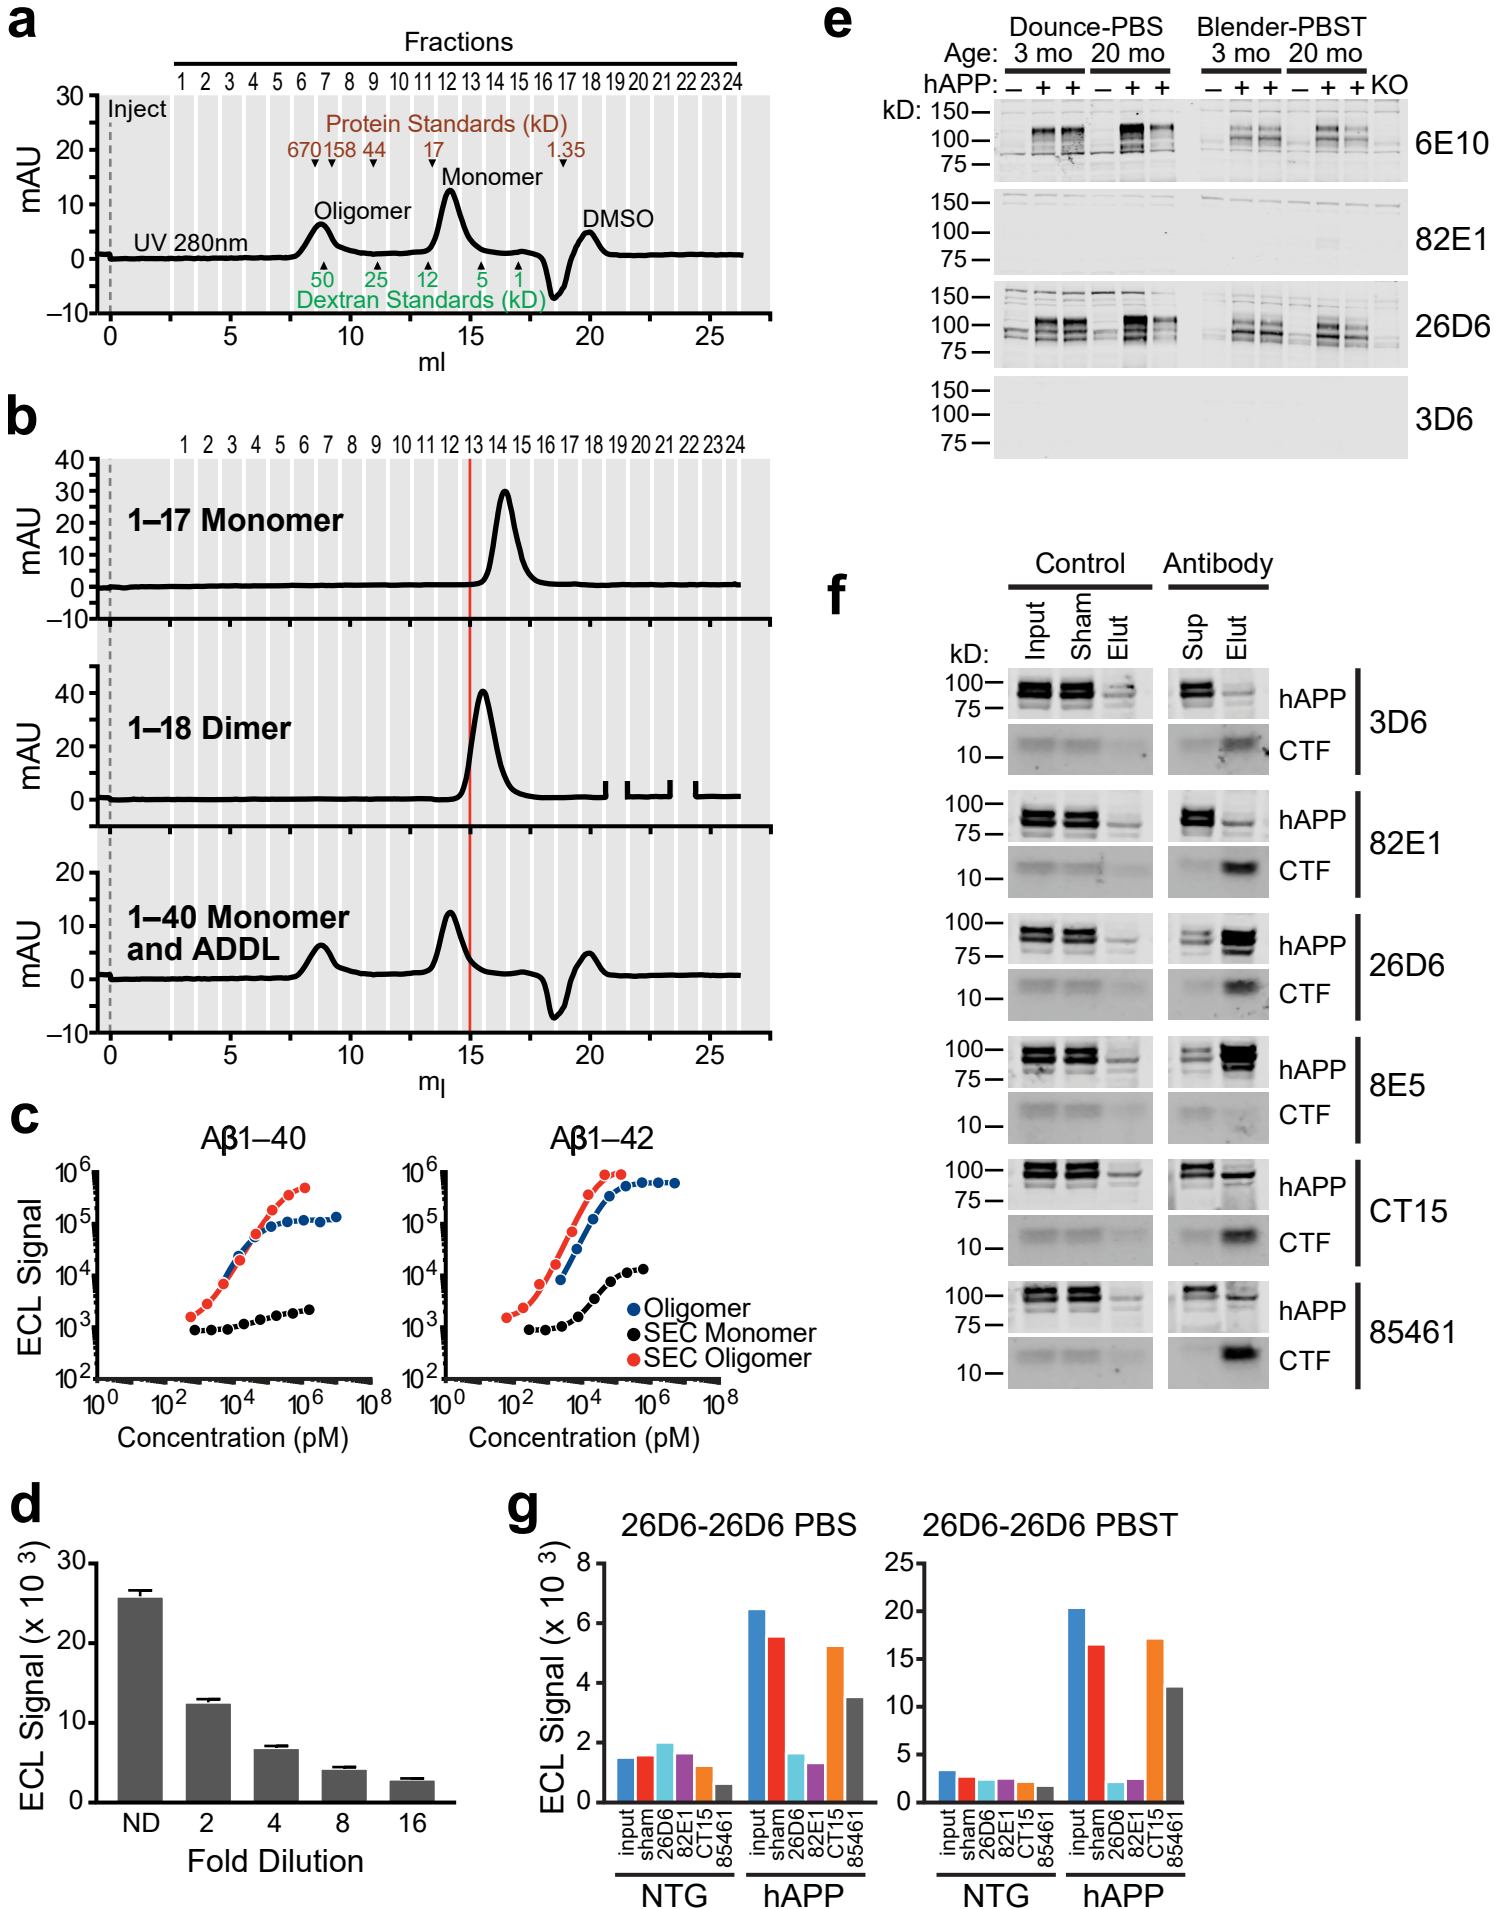

Figure S6

**a**

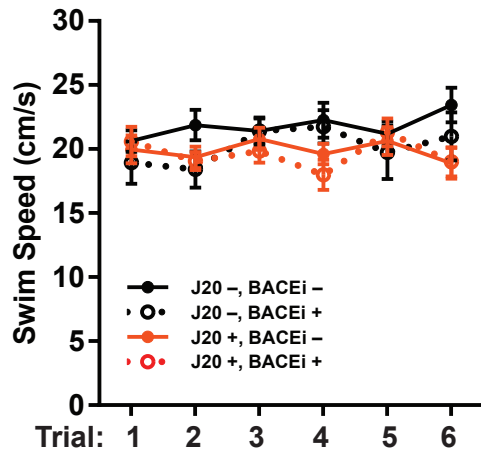

**b**

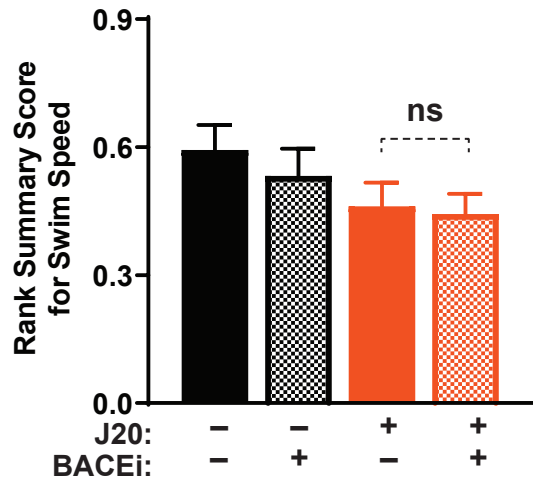

Figure S7

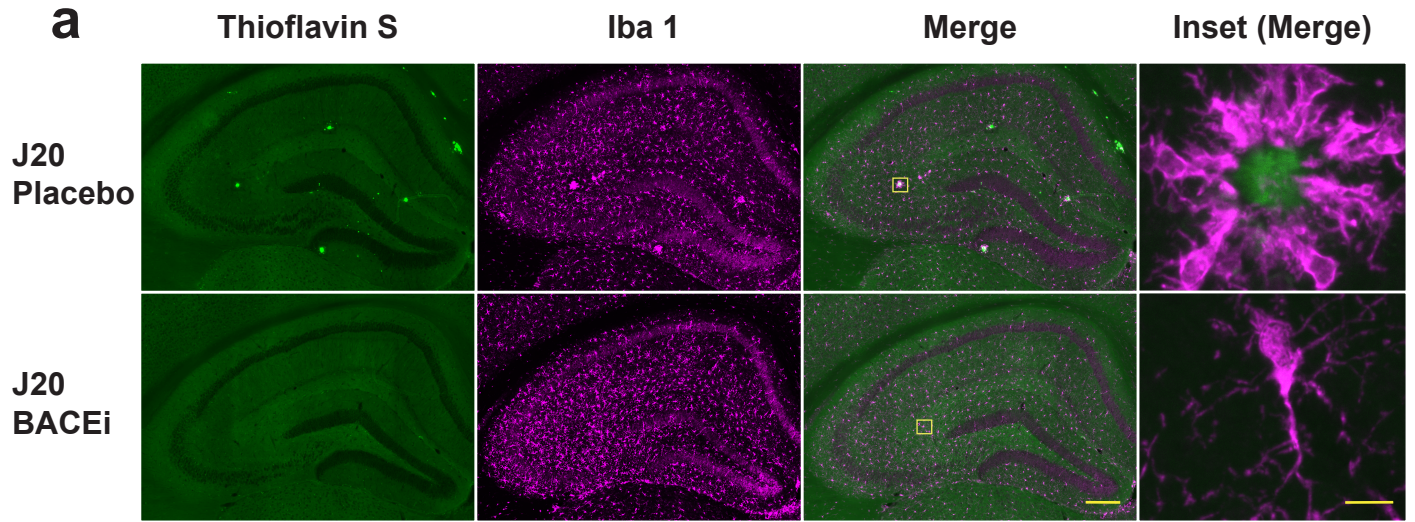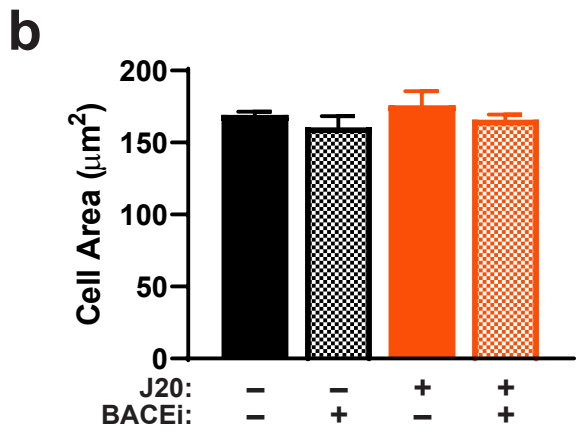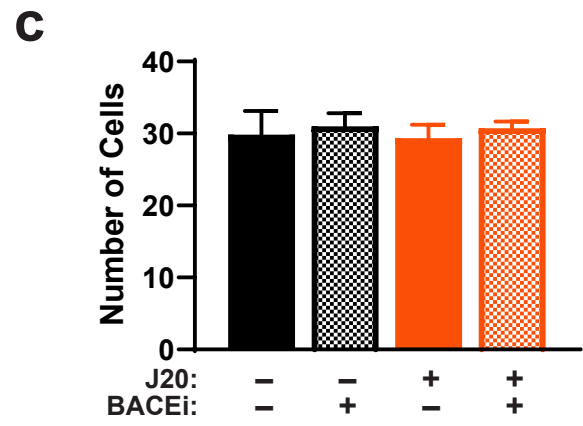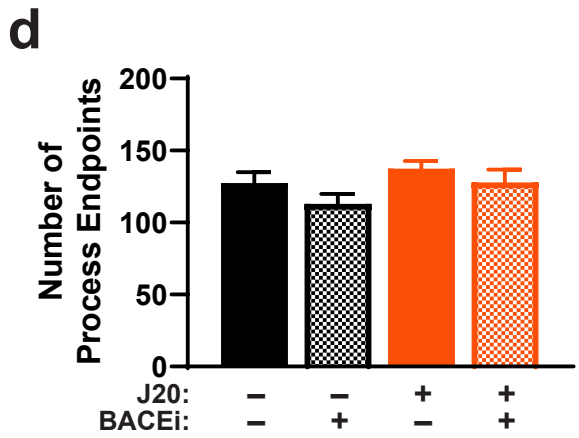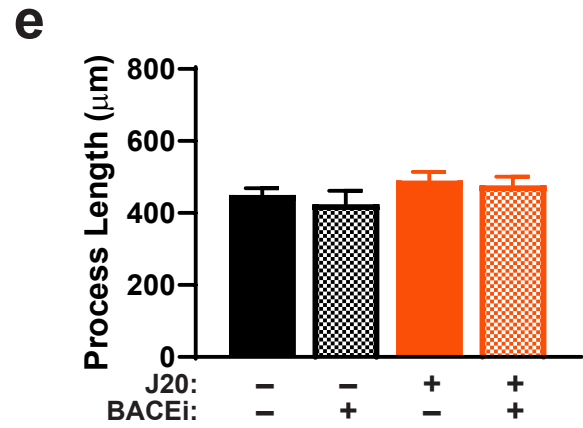



Figure S8

**a**

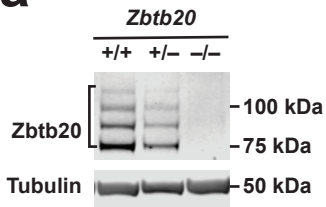

**b**

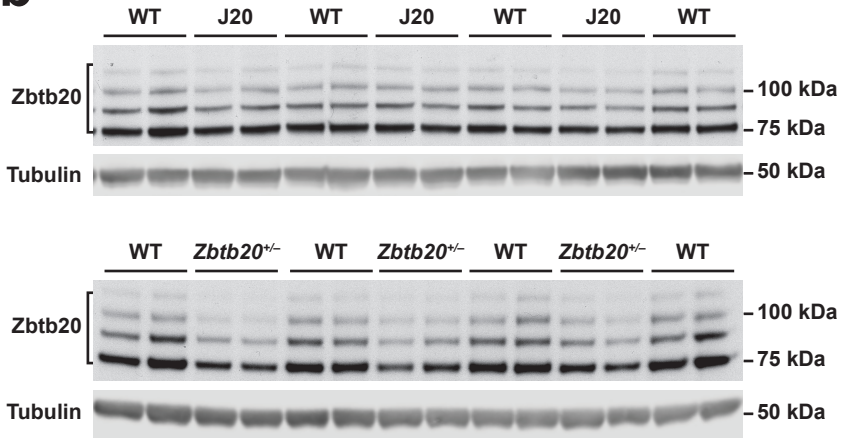

**d**

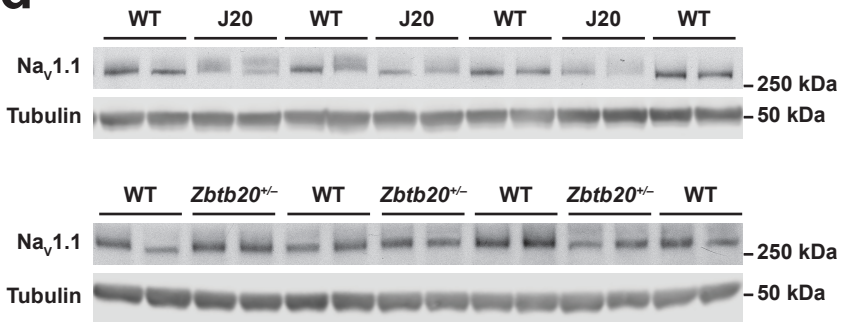

**c**

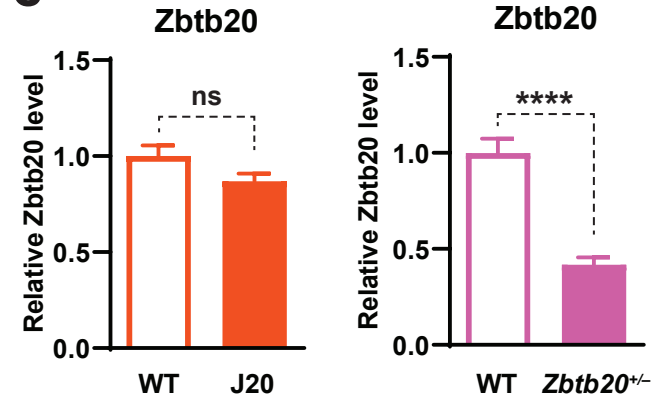

**e**

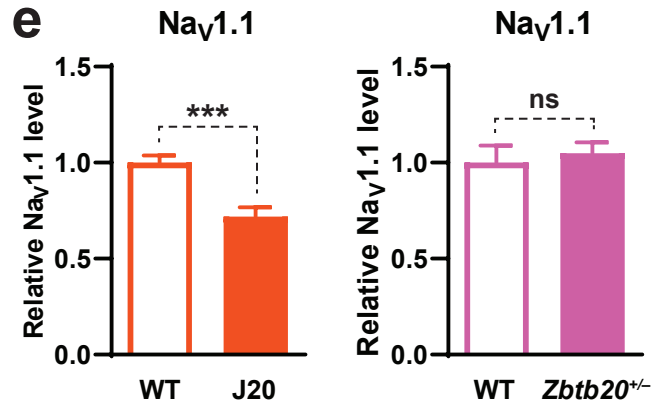

Supplement: 13024_2020_393_MOESM1_ESM.pdf [file 13024_2020_393_MOESM1_ESM.pdf]
